# Supplementary material for: An siRNA Screen in Pancreatic Beta Cells Reveals a Role for Gpr27 in Insulin Production
Source: PubMed Central journal article supplement (PMC3257298; doi:10.1371/journal.pgen.1002449), 2012-01-12

A

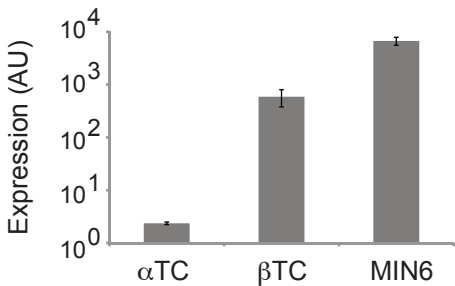

B

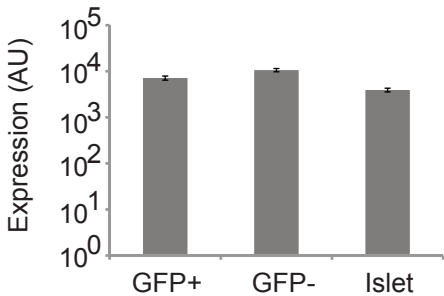

Supplement: pgen.1002449.s002.pdf [file pgen.1002449.s002.pdf]
